# Supplementary material for: The effects of thermal treatment and irradiation on the chemical properties of natural diamonds
Source: Royal Society of Chemistry journal article supplement (doi:10.1039/d2cp00764a), 2022-01-01
Supplement: d2cp00764a5.pdf [file d2cp00764a5.pdf]

## **The effects of thermal treatment and irradiation on the chemical properties of natural diamonds**

Ira Litvak<sup>1</sup>, Avner Cahana<sup>2</sup>, Yaakov Anker<sup>3</sup>, Sharon Ruthstein<sup>4</sup>, and Haim Cohen<sup>1,5\*</sup>

<sup>1</sup>Department of Chemical Sciences, Faculty of Natural Sciences, Ariel University, Ariel, Israel

<sup>2</sup>The Israeli Diamond Bourse- Dianer Diamonds Company Ltd.

<sup>3</sup>Department of Chemical Engineering and the Eastern R&D Center, Ariel, Israel

<sup>4</sup>Department of Chemistry and Institute of Nanotechnology & advanced Materials, Faculty of Exact Sciences, Bar Ilan University, Ramat Gan, Israel, 5290002.

<sup>5</sup>Department of Chemistry, Faculty of Natural Sciences, Ben Gurion U. of the Negev, Beer Sheva, Israel

\* Corresponding authors

**Keywords:** Diamonds, Color enhancement treatments, Stable carbon radicals, EPR spectroscopy, FTIR, Diamond optical centers, Diamond paramagnetic centers.

### **Supporting Information**

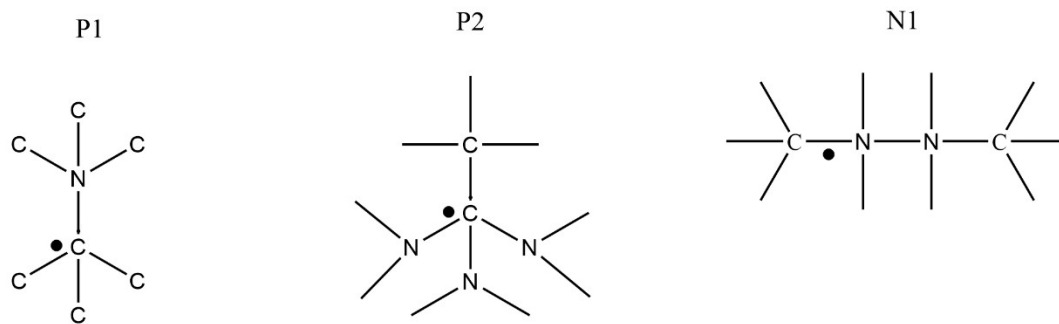

**Figure S1:** Diagrammatic structures of the paramagnetic centers P1, P2 and N1

| Sample<br>Group | 1   | 2    | 3    | 4    | 5    |
|-----------------|-----|------|------|------|------|
| Green           | +++ | +    | +++  | ++++ | ++   |
| Blue            | +++ | +    | ++++ | +++  | ++   |
| Yellow          | ++  | ++++ | +    | +++  | ++++ |

**Table S1:** The level of darkness for the five samples for each color group after the final treatments: i) green (post irradiation only), ii) blue, and iii) yellow after irradiation and thermal treatments. (Intensity was graded from + (low) to ++++ (high) intensity by visual assessments.

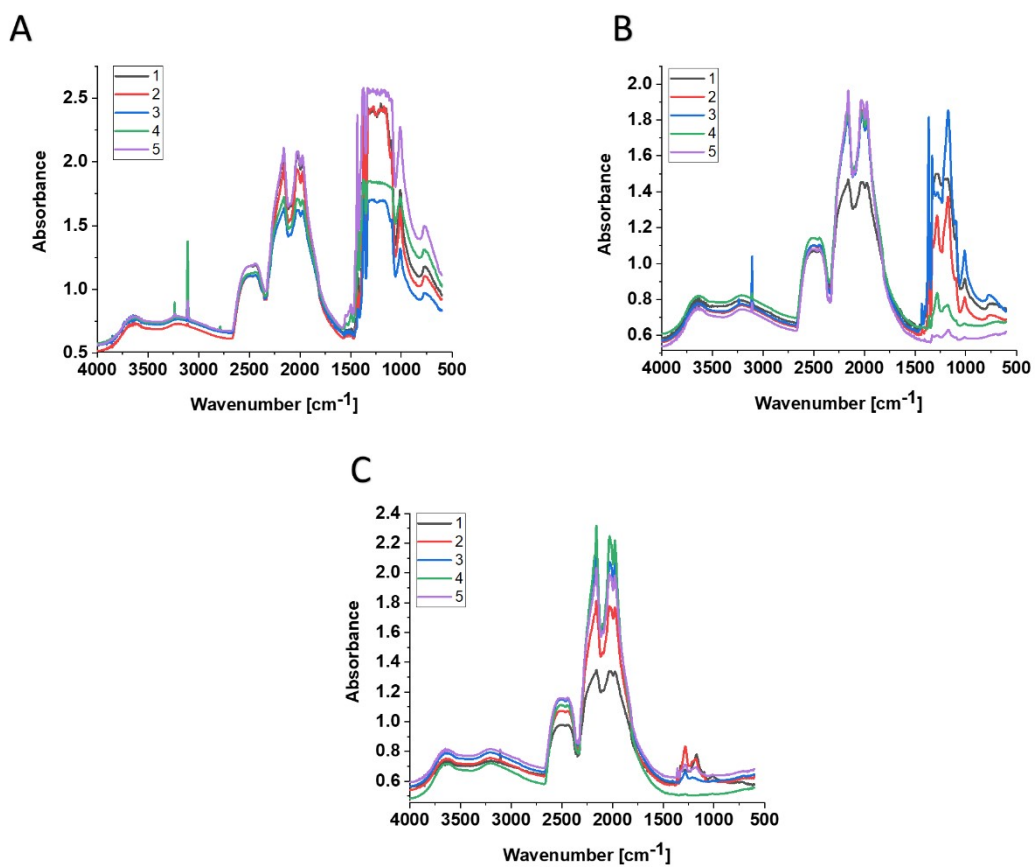

**Figure S2:** Raw FTIR spectra of the fancy diamonds after treatments: green (post irradiation only), blue, and yellow for all samples A) Green, B) Blue and B) Yellow

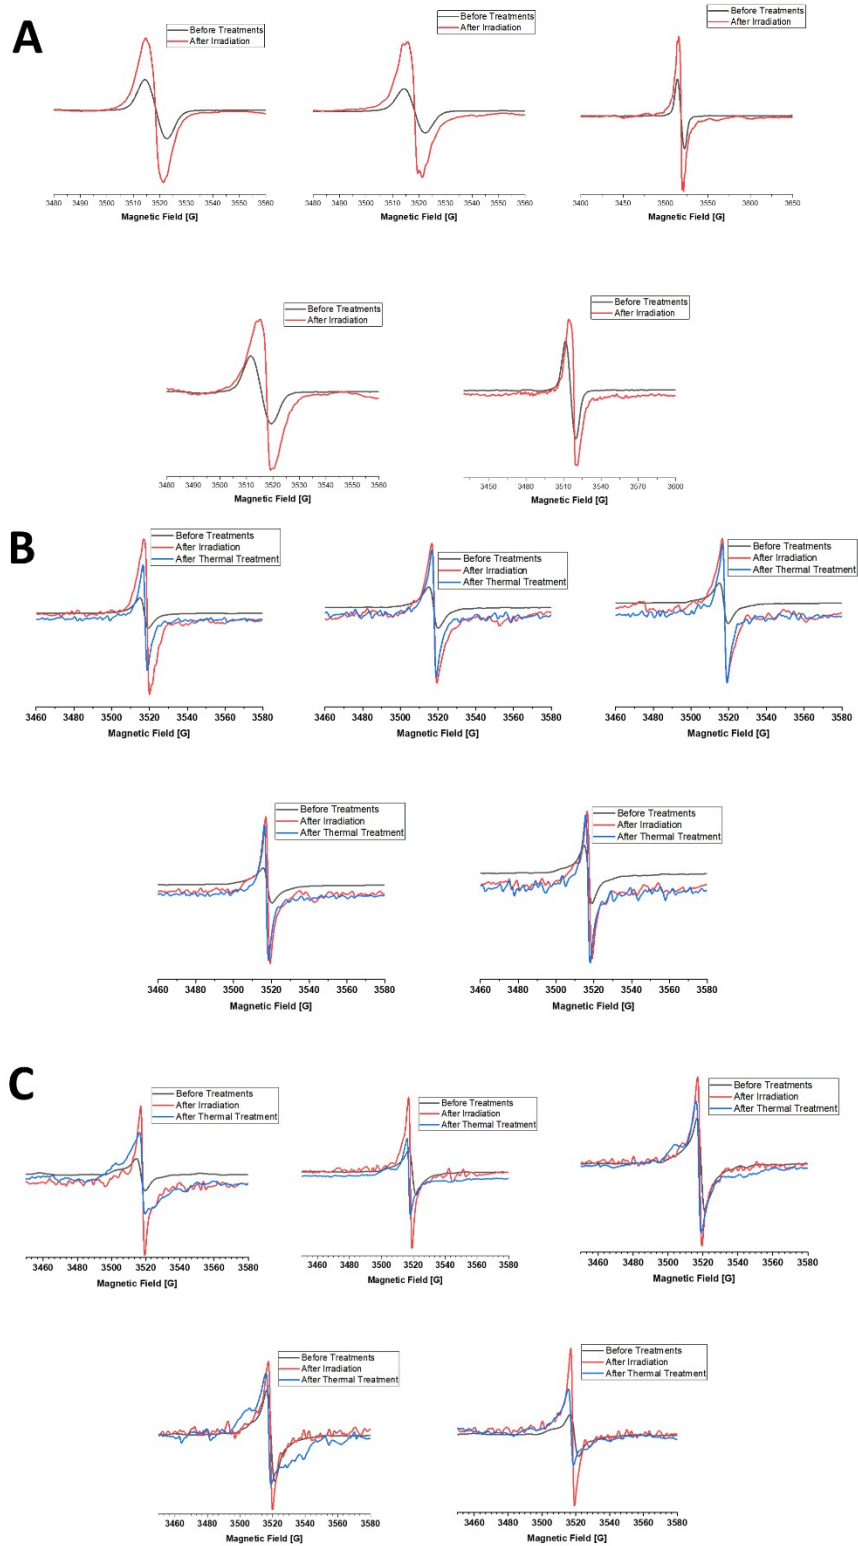

**Figure S3:** EPR spectra before and after treatments for all samples: A) Green (irradiation only), B) Blue and C) Yellow
