# Supplementary figures and images for: The effects of thermal treatment and irradiation on the chemical properties of natural diamonds
Source: Royal Society of Chemistry journal article supplement (doi:10.1039/d2cp00764a), 2022-01-01

P1

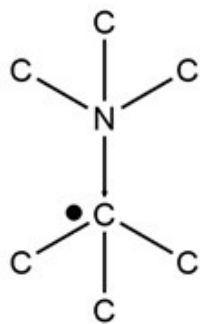

P2

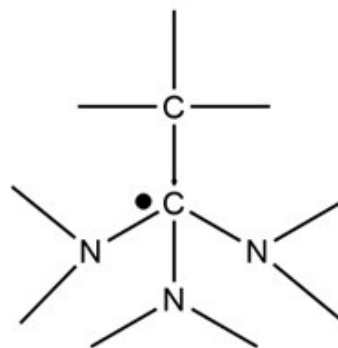

N1

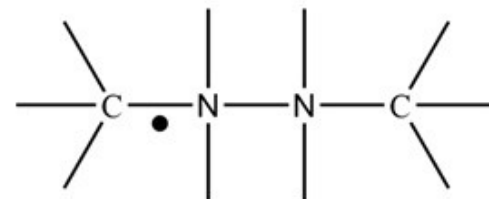

Supplement: d2cp00764a2.pdf [file d2cp00764a2.pdf]

A

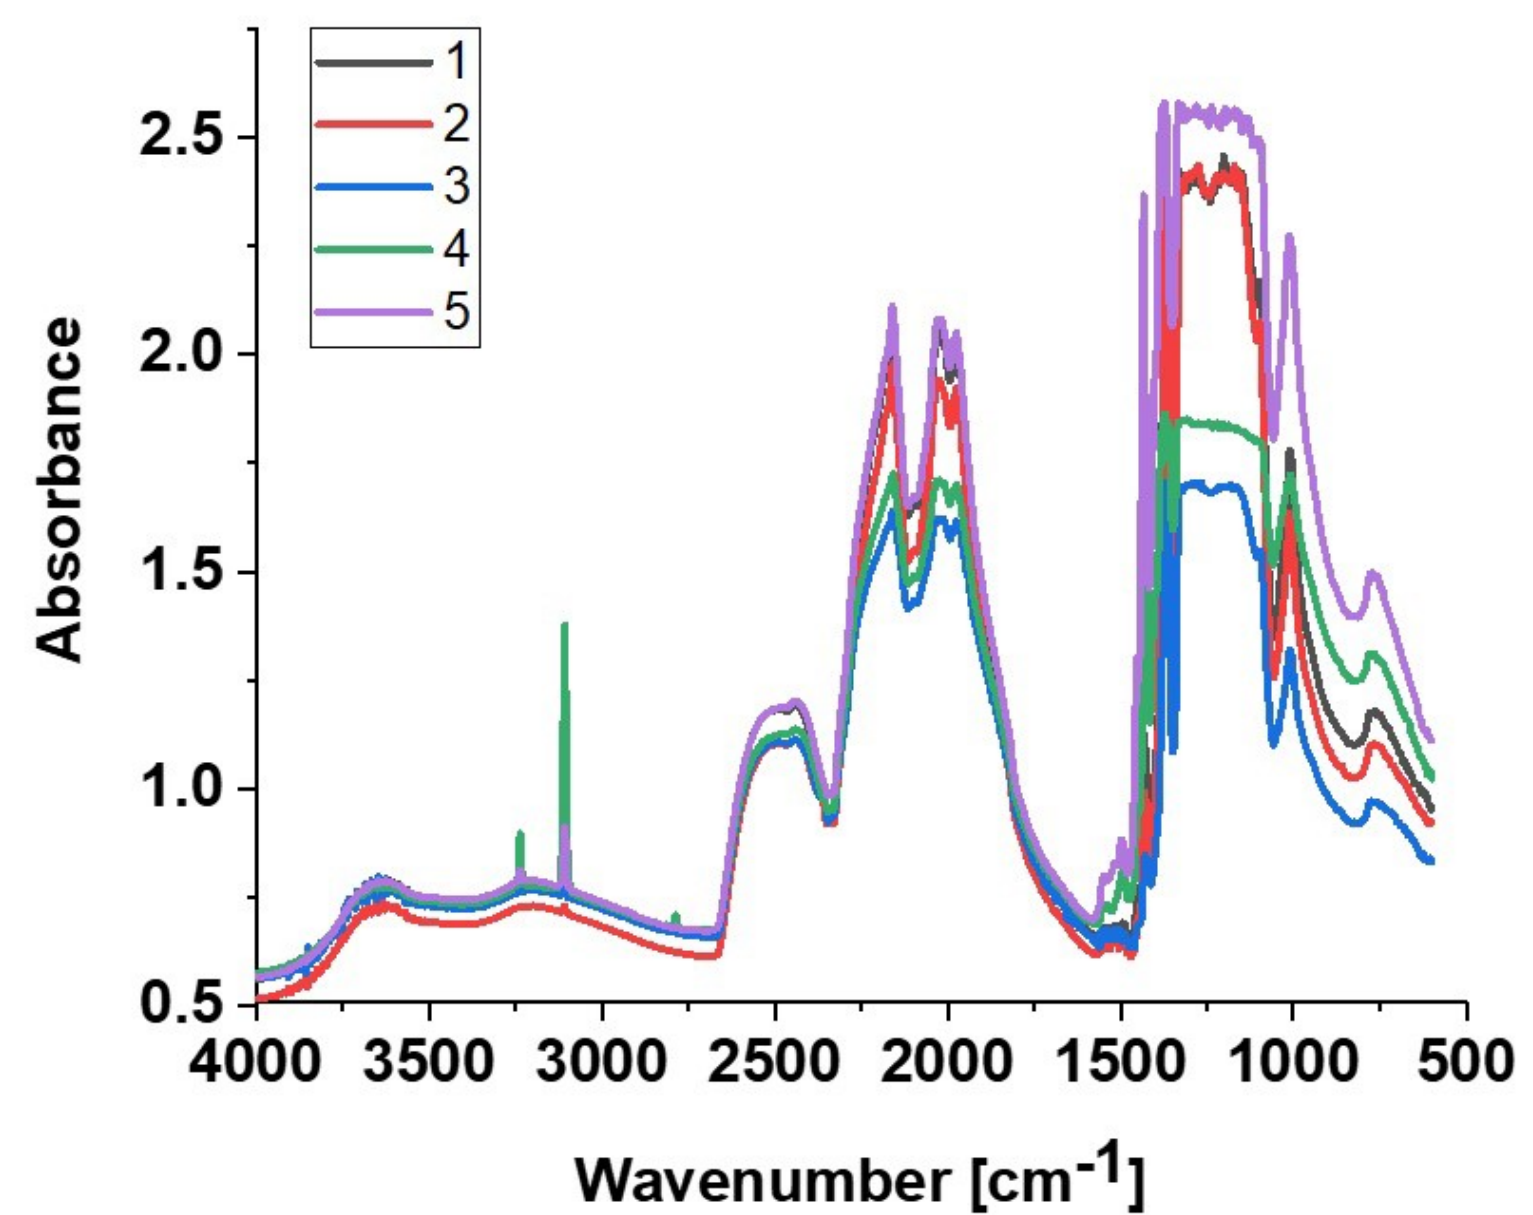

B

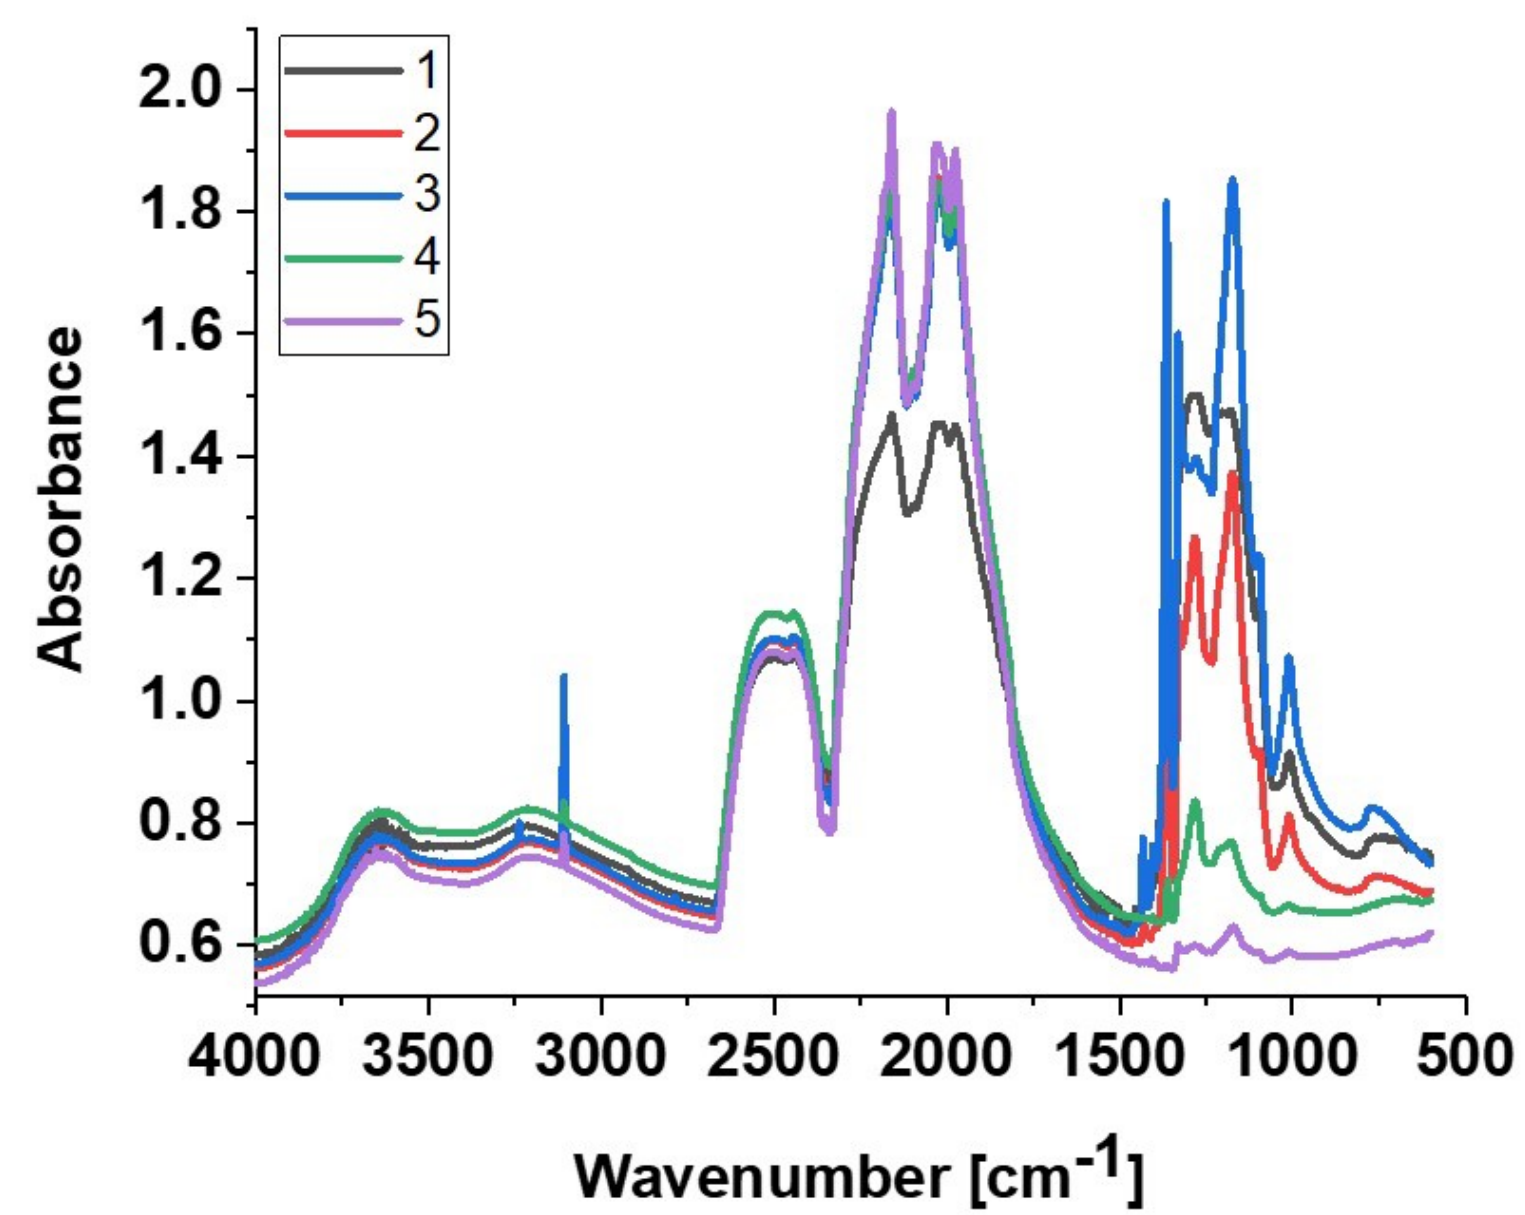

C

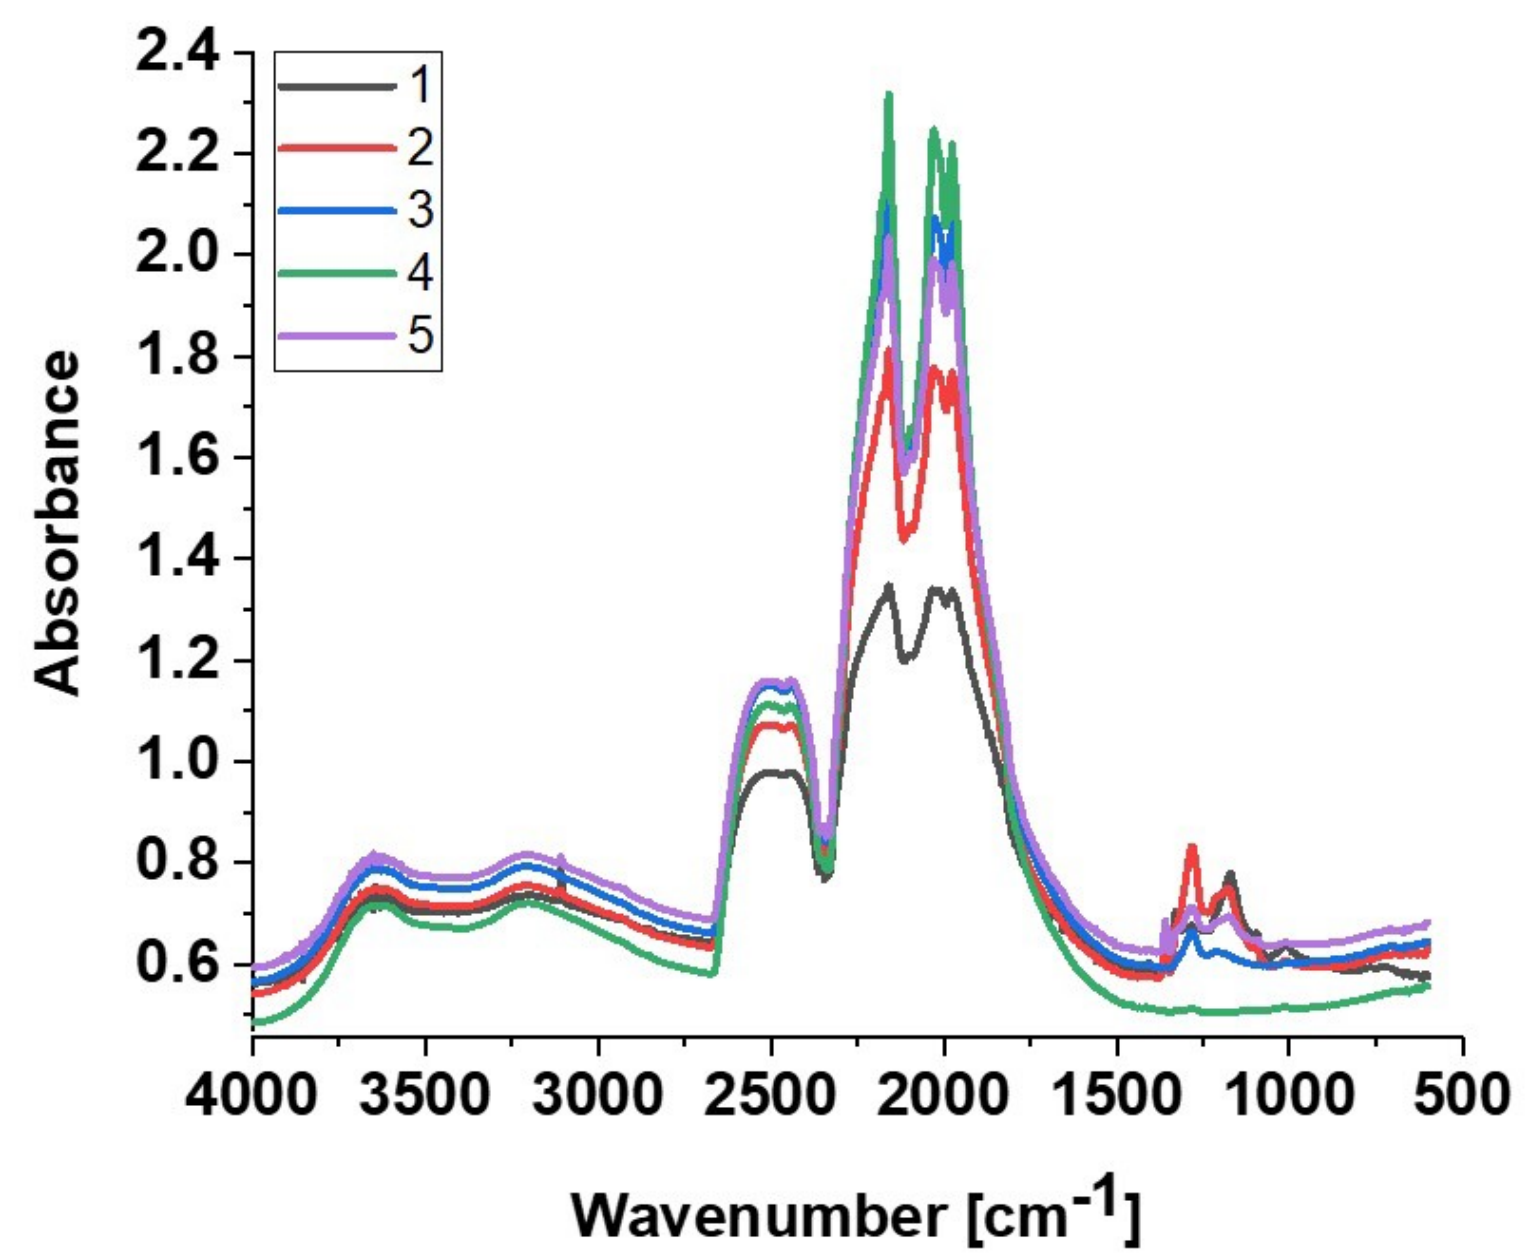

Supplement: d2cp00764a3.pdf [file d2cp00764a3.pdf]

**A**

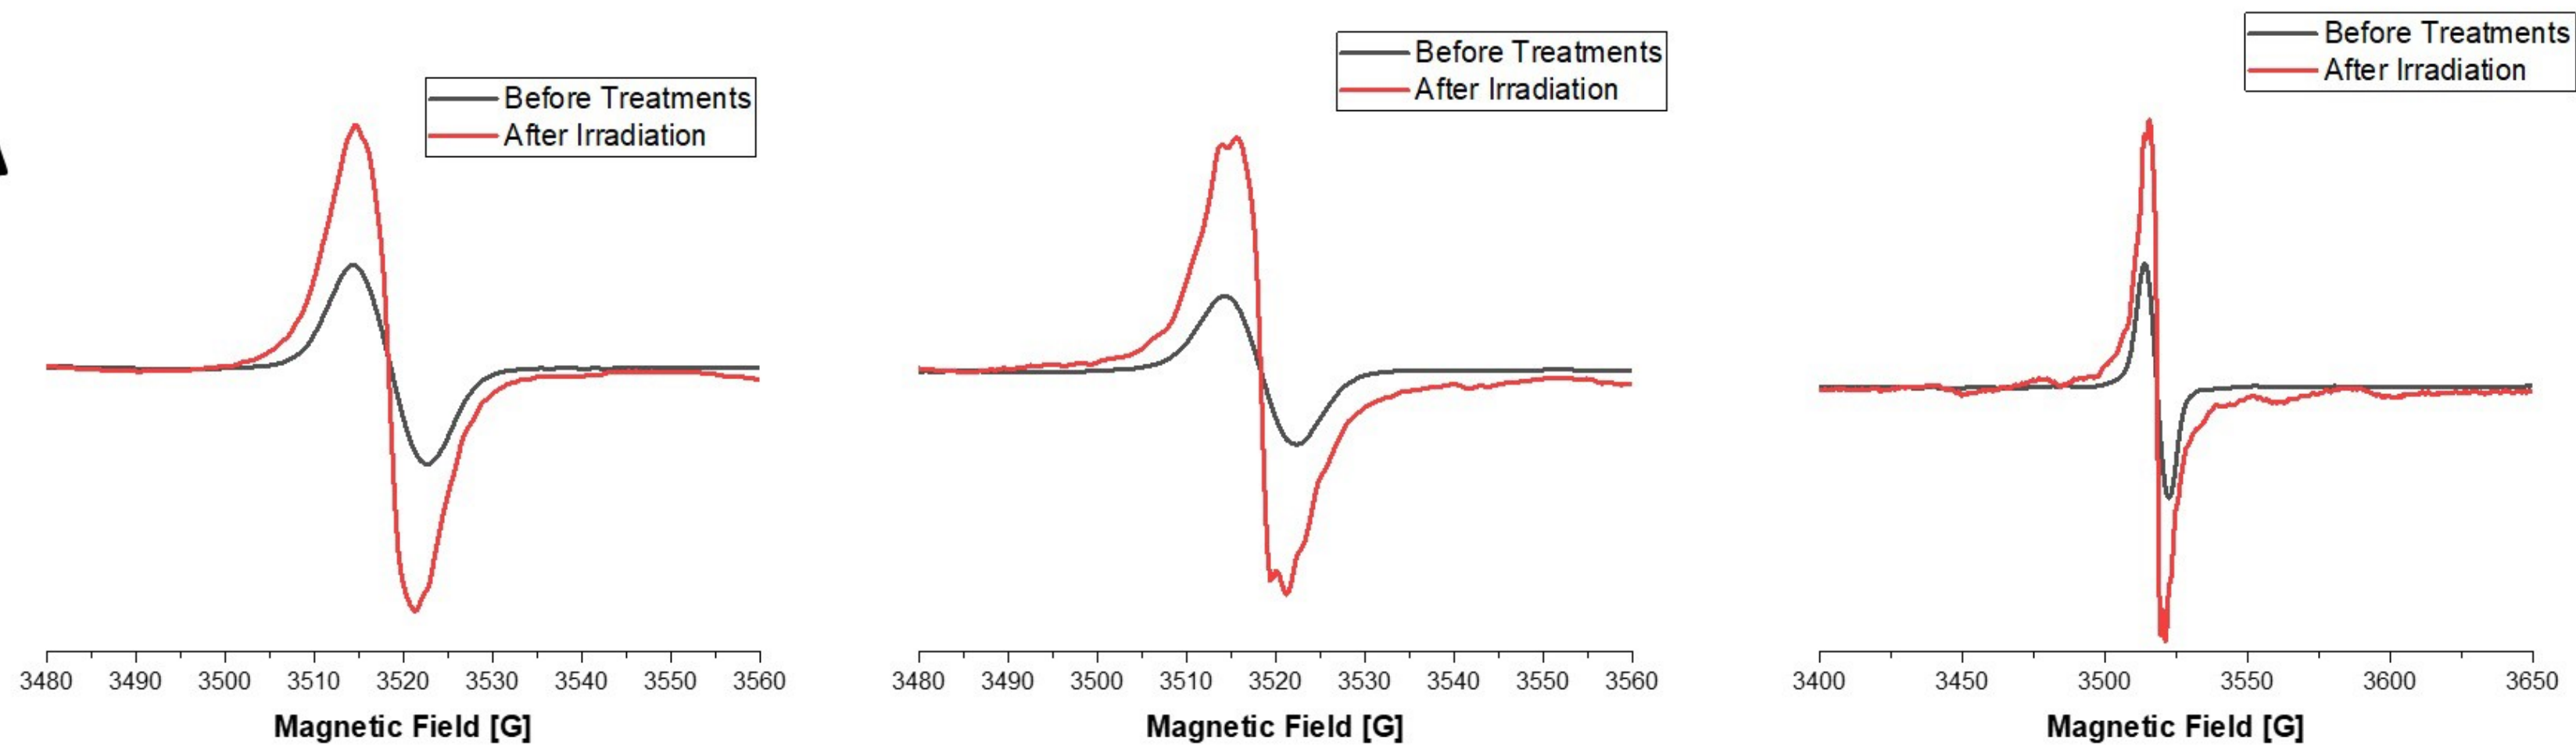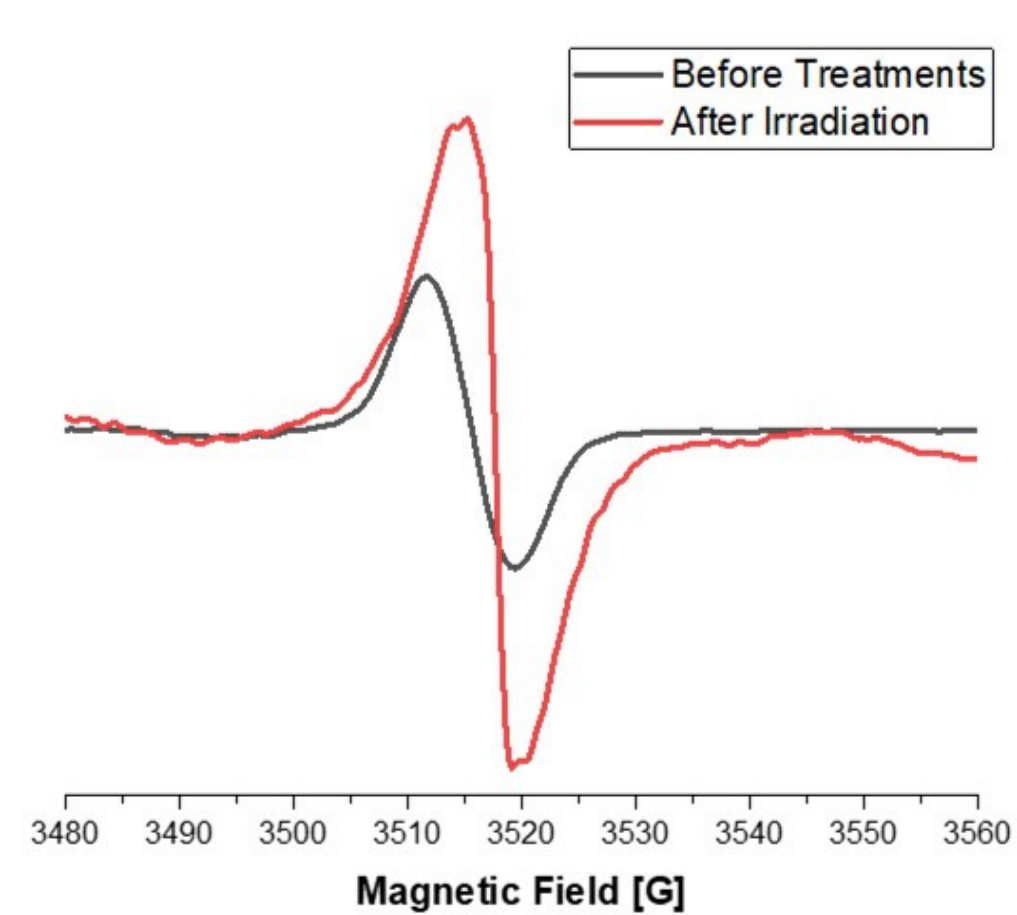

**B**

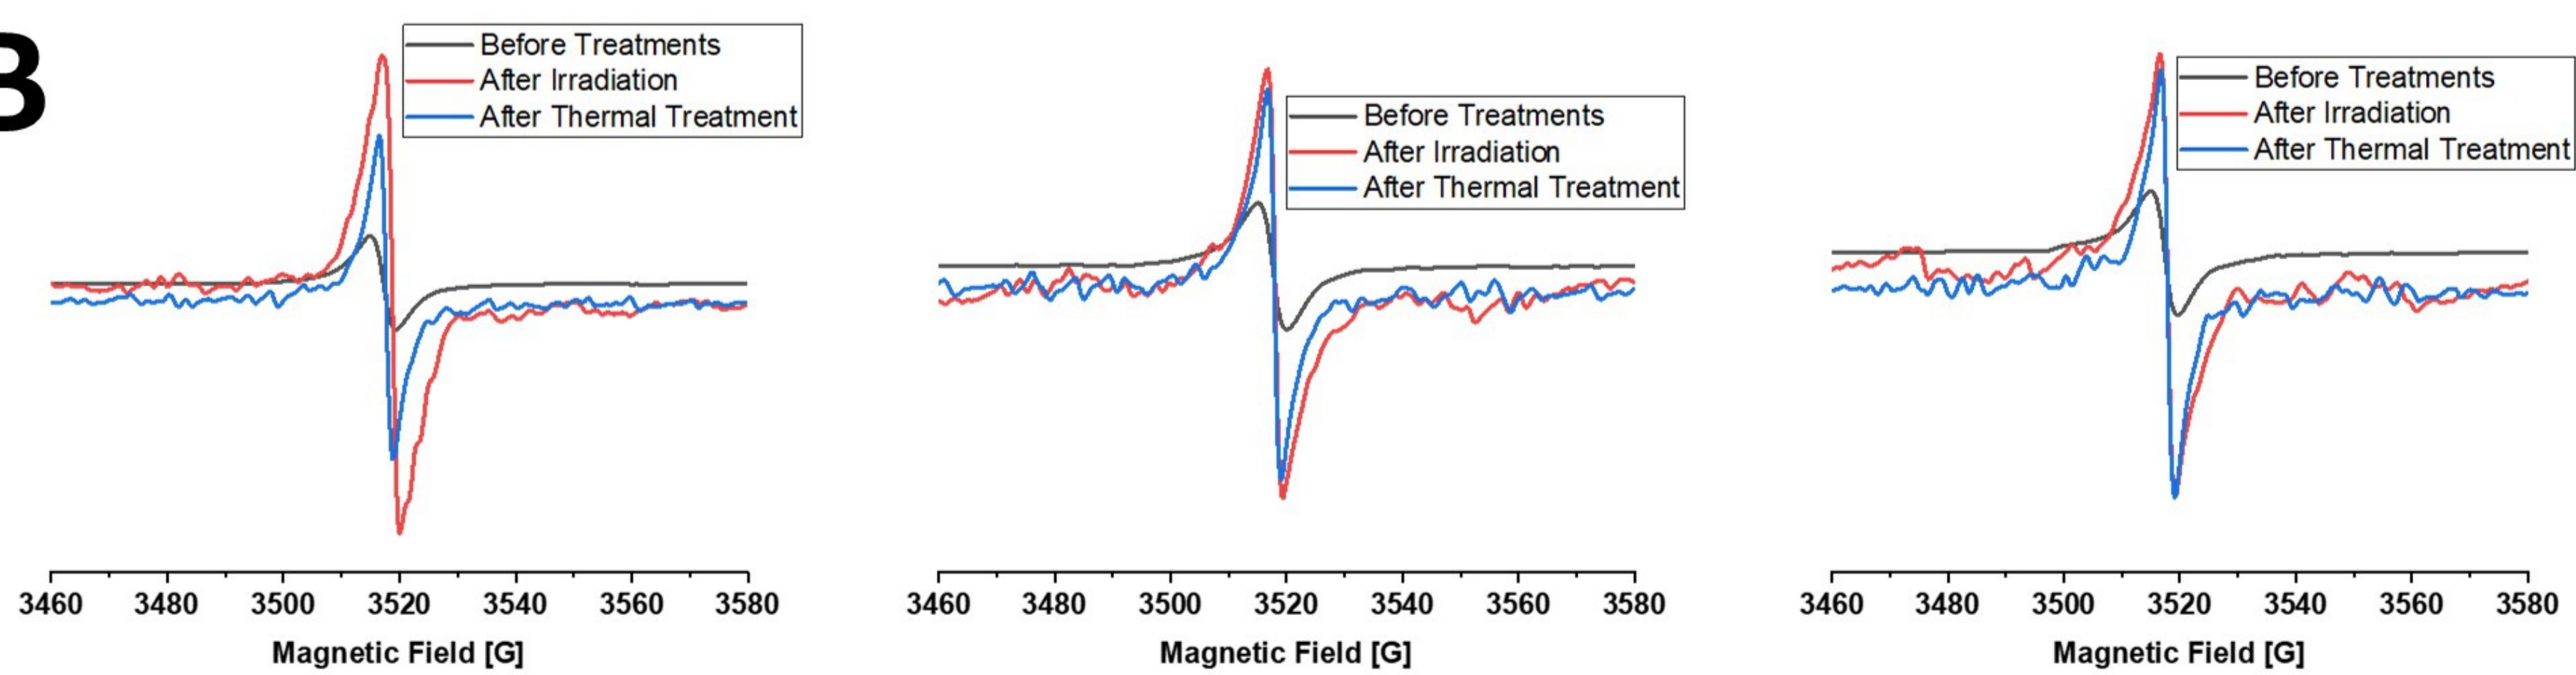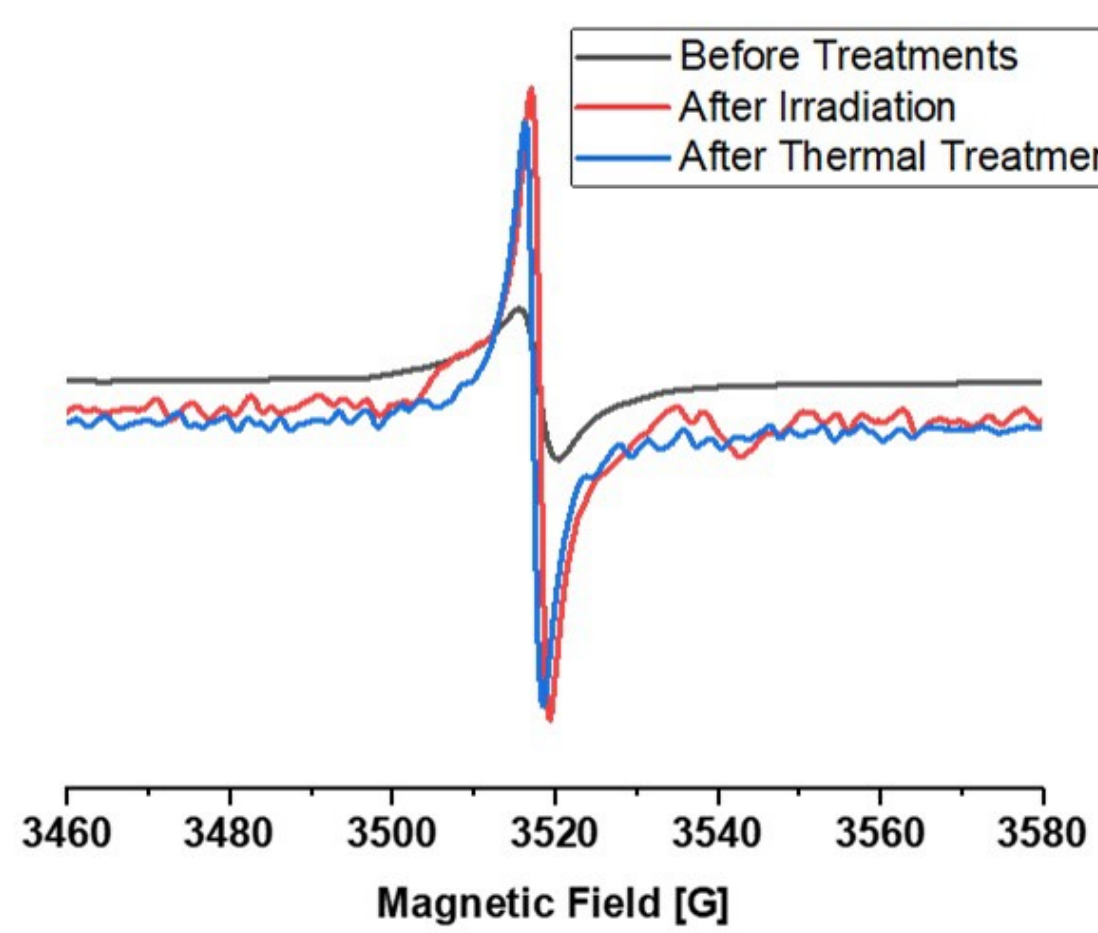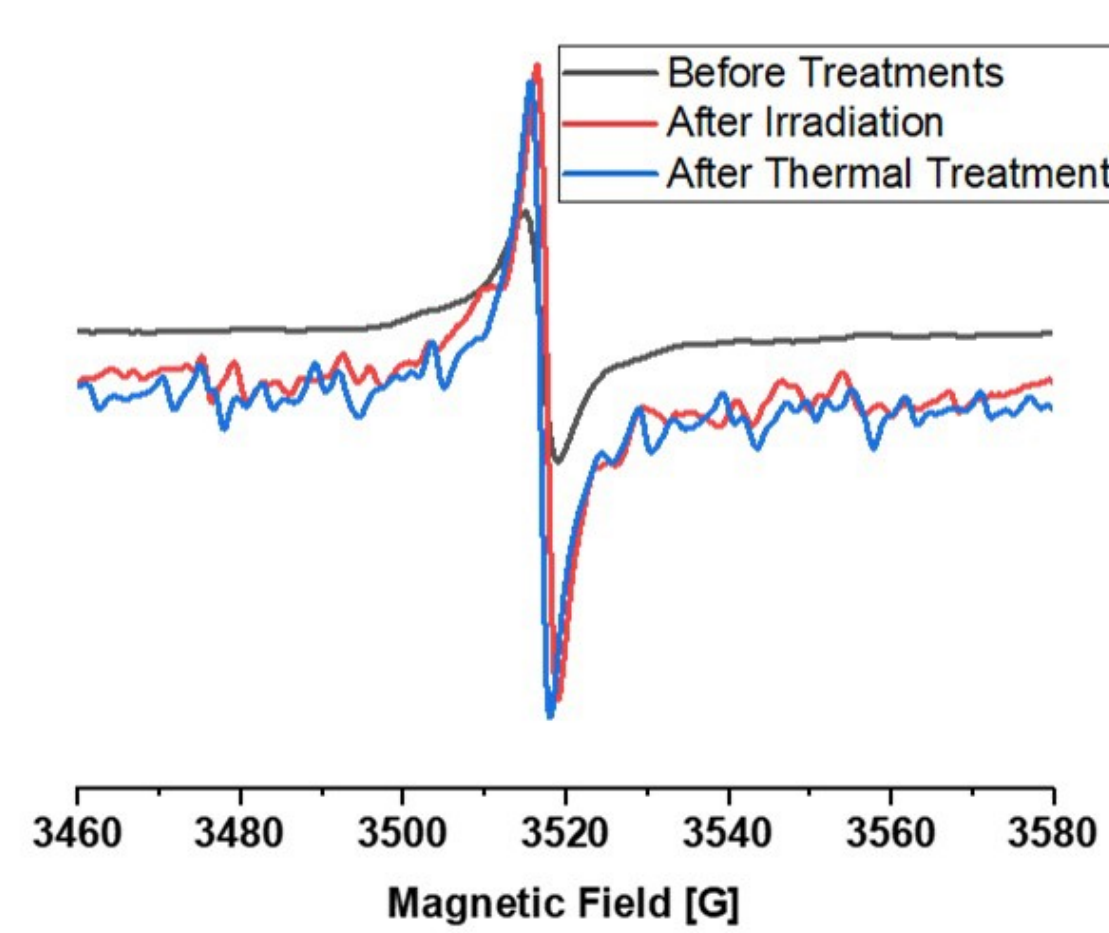

**C**

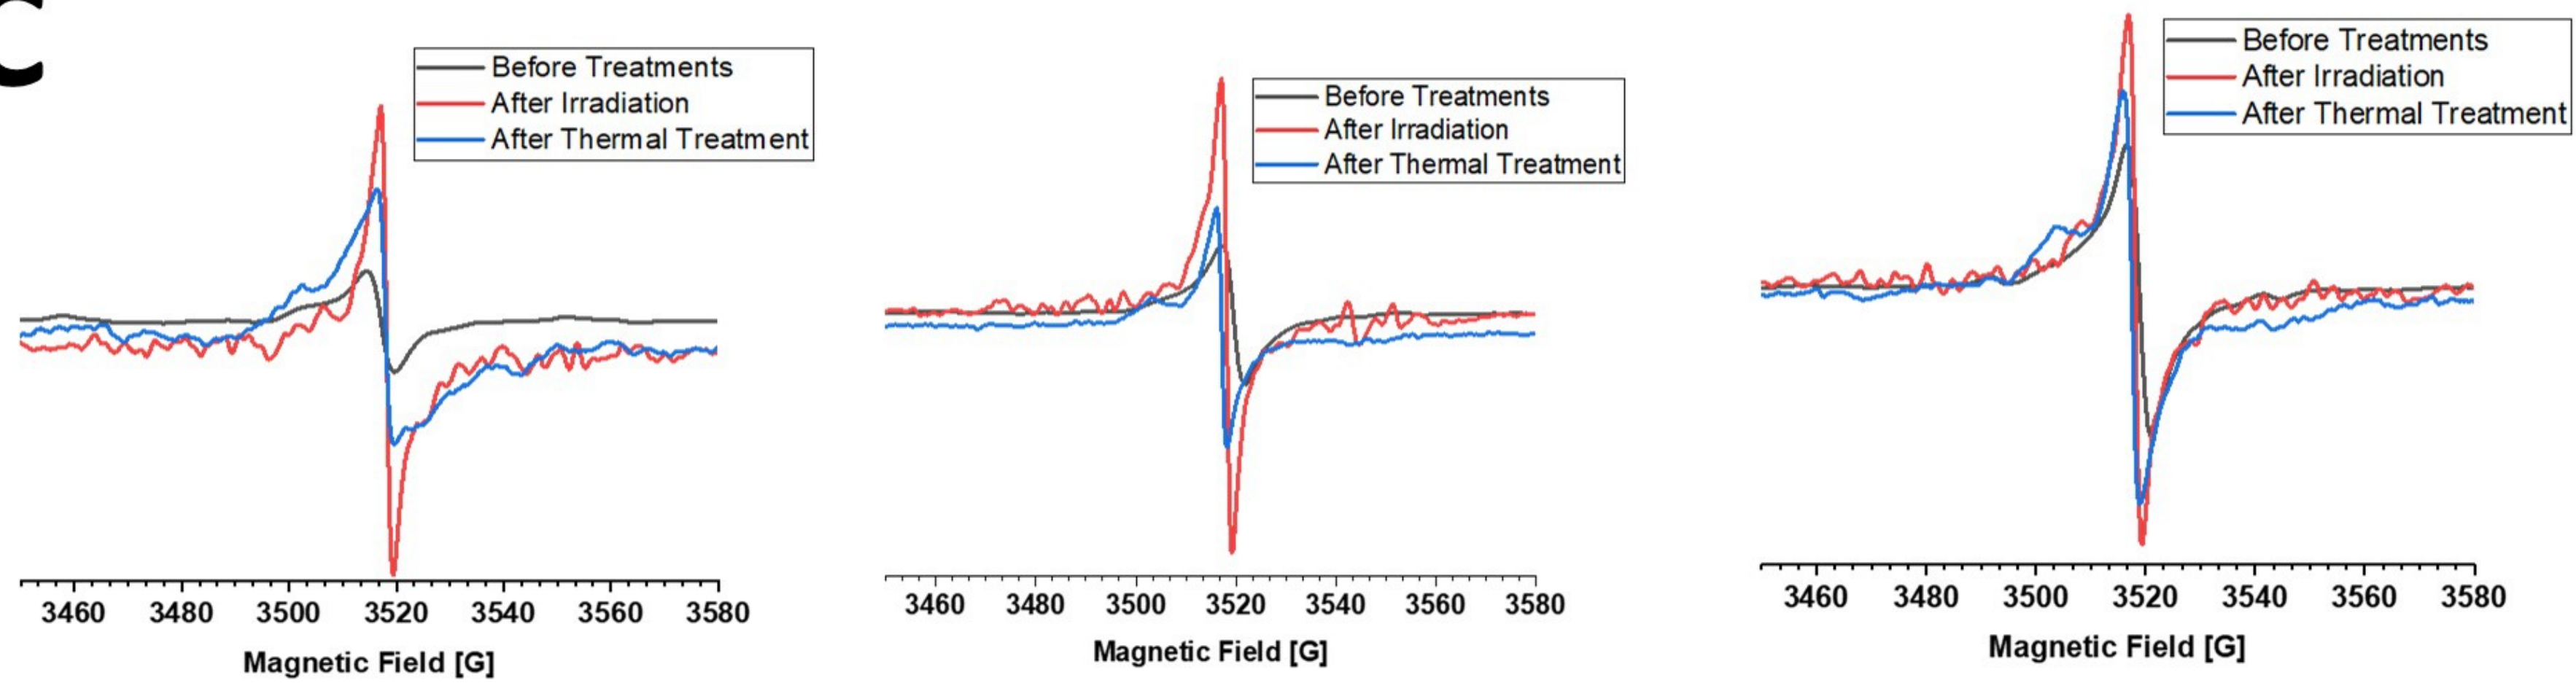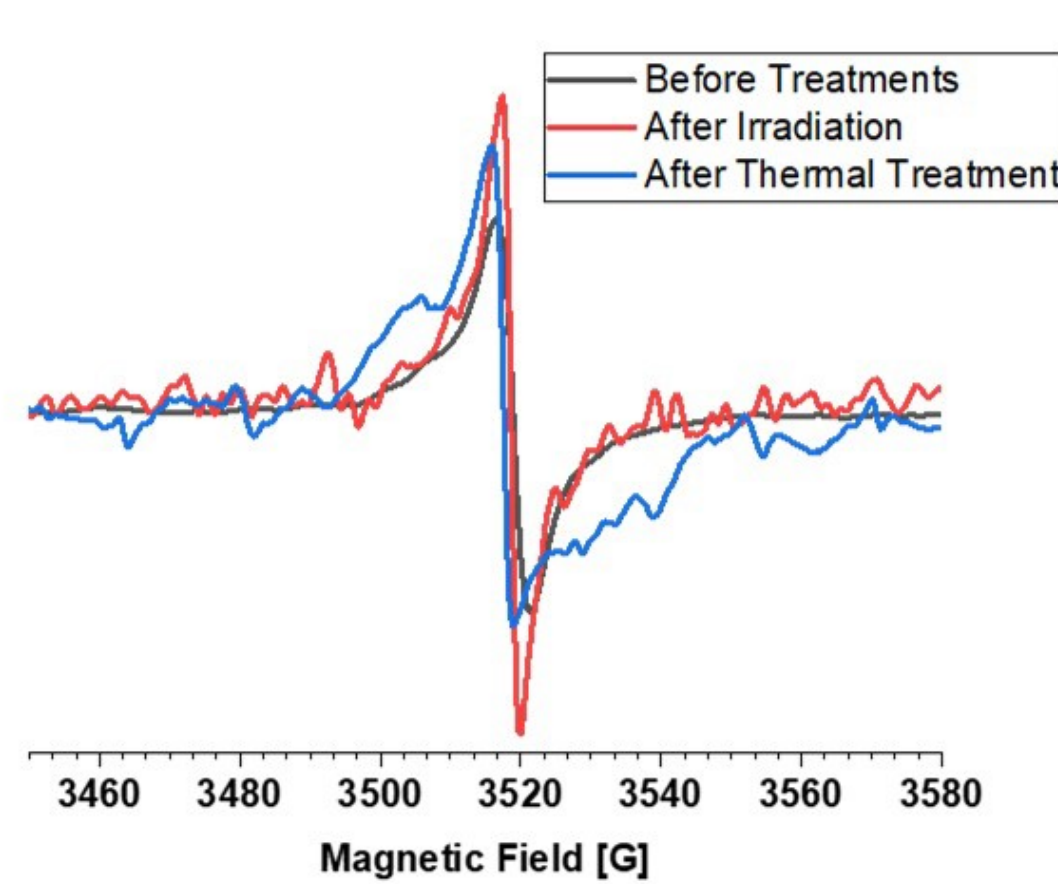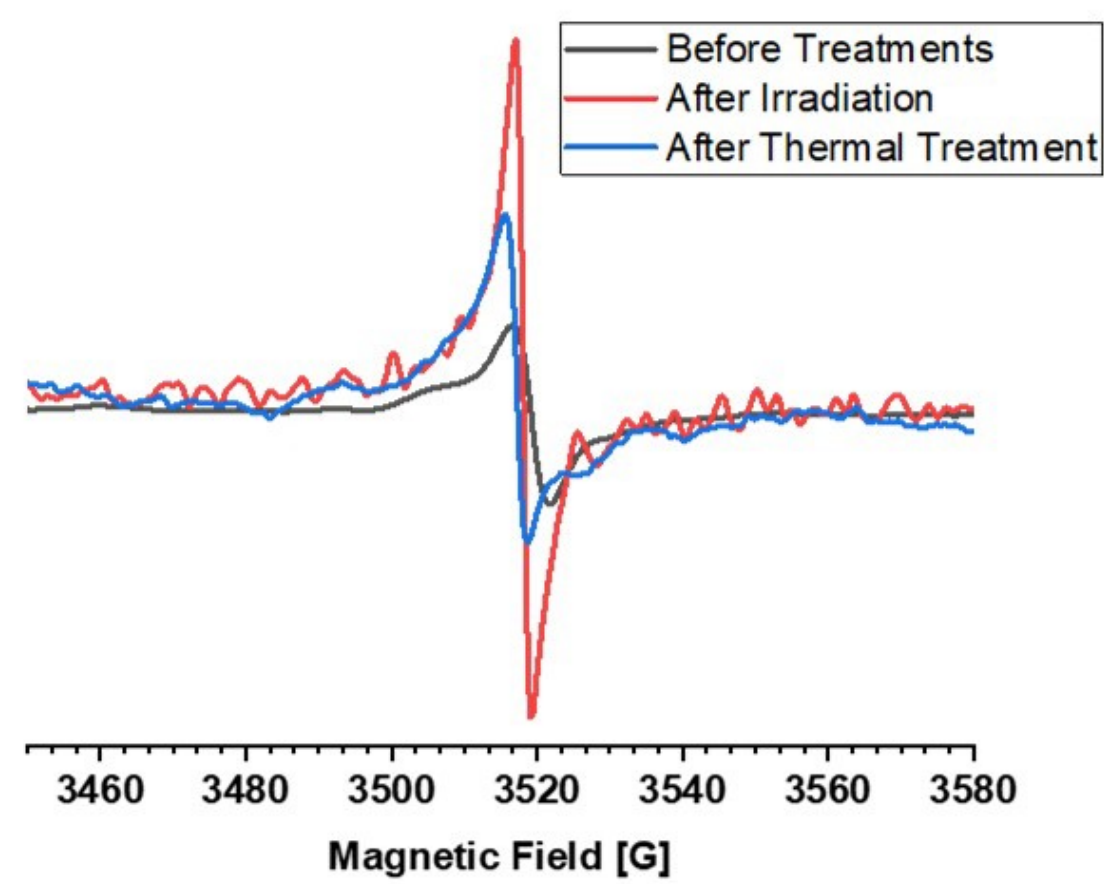

Supplement: d2cp00764a4.pdf [file d2cp00764a4.pdf]
